# Supplementary material for: Sample size calculations in pediatric clinical trials conducted in an ICU: a systematic review
Source: PubMed Central journal article supplement (PMC4107993; doi:10.1186/1745-6215-15-274), 2014-07-08
Supplement: 1745-6215-15-274-S3.pdf [file 1745-6215-15-274-S3.pdf]

| Paper                      | Year of Publication | Registration Number | Outcome (Continuous/Dichotomous) | Crossover Design (Yes/No) | Type I Error by Design (reported in the Methods section) |                      | Type II Error (1-power) by Design (reported in the Methods section) |                         | Expected Nuisance Parameter Standard deviation for continuous outcomes, control group event rate for dichotomous outcomes) | Total Sample Size by Design (reported in the Methods section) | Source of information for nuisance parameter estimation (Lit=Literature, OE = Own Experience, PS= Pilot study) | Expected Effect Size (cohen's d for continuous outcomes, risk ratio for dichotomous outcomes) | Observed Nuisance Parameter (from Results Section) |
|----------------------------|---------------------|---------------------|----------------------------------|---------------------------|----------------------------------------------------------|----------------------|---------------------------------------------------------------------|-------------------------|----------------------------------------------------------------------------------------------------------------------------|---------------------------------------------------------------|----------------------------------------------------------------------------------------------------------------|-----------------------------------------------------------------------------------------------|----------------------------------------------------|
|                            |                     |                     |                                  |                           | in the Methods section)                                  | Sided, NR: reported) | in the Methods section)                                             | in the Methods section) |                                                                                                                            |                                                               |                                                                                                                |                                                                                               |                                                    |
| Almenrader et al, 2007     | 2007                | NR                  | Dichotomous                      | NO                        | 0.05                                                     | NR                   | 0.2                                                                 | 0.79                    | 60                                                                                                                         | Lit                                                           | 1.25                                                                                                           | 0.76                                                                                          |                                                    |
| Armangil et al, 2011       | 2011                | NR                  | Continuous                       | NO                        | 0.05                                                     | NR                   | NR                                                                  | NR                      | NR                                                                                                                         | NR                                                            | NR                                                                                                             | NR                                                                                            |                                                    |
| Arnon et al, 2006          | 2006                | NR                  | Continuous                       | NO                        | 0.05                                                     | NR                   | 0.2                                                                 | NR                      | 120                                                                                                                        | NR                                                            | NR                                                                                                             | 4.17                                                                                          |                                                    |
| Beardsall et al, 2008      | 2008                | ISRCTN78428828      | Dichotomous                      | NO                        | 0.05                                                     | NR                   | 0.2                                                                 | 0.2                     | 430                                                                                                                        | PS                                                            | 0.5                                                                                                            | 0.09                                                                                          |                                                    |
| Bigham et al, 2010         | 2010                | NCT00410150         | Continuous                       | NO                        | 0.05                                                     | two-sided            | 0.2                                                                 | 1.6                     | 348                                                                                                                        | OE                                                            | -0.31                                                                                                          | 1.65                                                                                          |                                                    |
| Bogie et al, 2007          | 2007                | NR                  | Continuous                       | NO                        | 0.05                                                     | one-sided            | 0.18                                                                | 1.5                     | 60                                                                                                                         | NR                                                            | -0.67                                                                                                          | 3.4                                                                                           |                                                    |
| Bonsante et al, 2007       | 2007                | NR                  | Dichotomous                      | NO                        | 0.05                                                     | NR                   | 0.2                                                                 | 0.35                    | 138                                                                                                                        | Lit                                                           | 1.71                                                                                                           | 0.32                                                                                          |                                                    |
| Boogaard et al, 2007       | 2007                | NR                  | Continuous                       | NO                        | 0.05                                                     | two-sided            | 0.2                                                                 | 6.3                     | 180                                                                                                                        | Lit                                                           | 0.4                                                                                                            | NR                                                                                            |                                                    |
| Boyer et al, 2009          | 2009                | NCT00685230         | Dichotomous                      | NO                        | 0.05                                                     | two-sided            | 0.2                                                                 | 0.2                     | 14                                                                                                                         | OE                                                            | 4.75                                                                                                           | 0.16                                                                                          |                                                    |
| Cattarelli et al, 2006     | 2006                | NR                  | Continuous                       | NO                        | 0.05                                                     | two-sided            | 0.1                                                                 | NR                      | 40                                                                                                                         | NR                                                            | NR                                                                                                             | NR                                                                                            |                                                    |
| Chhabra et al, 2009        | 2009                | NR                  | Dichotomous                      | NO                        | 0.05                                                     | NR                   | 0.1                                                                 | 0.5                     | 200                                                                                                                        | PS                                                            | 0.54                                                                                                           | 0.479                                                                                         |                                                    |
| Choong et al, 2010         | 2010                | NR                  | Continuous                       | NO                        | 0.05                                                     | NR                   | 0.1                                                                 | NR                      | 30                                                                                                                         | OE                                                            | NR                                                                                                             | NR                                                                                            |                                                    |
| Chu et al, 2006            | 2006                | NR                  | Continuous                       | NO                        | 0.05                                                     | NR                   | 0.1                                                                 | 0.8                     | 40                                                                                                                         | NR                                                            | 1.06                                                                                                           | NR                                                                                            |                                                    |
| Cignacco et al, 2008       | 2008                | NR                  | Continuous                       | NO                        | 0.05                                                     | one-sided            | 0.2                                                                 | NR                      | 100                                                                                                                        | NR                                                            | 0.5                                                                                                            | NR                                                                                            |                                                    |
| Cogen et al, 2011          | 2011                | NR                  | Continuous                       | NO                        | NR                                                       | NR                   | NR                                                                  | NR                      | NR                                                                                                                         | NR                                                            | NR                                                                                                             | NR                                                                                            |                                                    |
| Cresi et al, 2008          | 2008                | NR                  | Continuous                       | NO                        | 0.05                                                     | NR                   | NR                                                                  | NR                      | NR                                                                                                                         | NR                                                            | NR                                                                                                             | NR                                                                                            |                                                    |
| Darnell et al, 2008        | 2008                | NCT00286052         | Continuous                       | NO                        | 0.05                                                     | NR                   | 0.2                                                                 | 47                      | 124                                                                                                                        | OE                                                            | -0.5                                                                                                           | 44                                                                                            |                                                    |
| Doyle et al, 2007          | 2007                | NR                  | Dichotomous                      | NO                        | 0.05                                                     | two-sided            | 0.2                                                                 | 0.5                     | 814                                                                                                                        | NR                                                            | 1.2                                                                                                            | 0.59                                                                                          |                                                    |
| Duman et al, 2010          | 2010                | NR                  | Dichotomous                      | NO                        | 0.05                                                     | NR                   | NR                                                                  | NR                      | NR                                                                                                                         | Lit                                                           | NR                                                                                                             | 0.52                                                                                          |                                                    |
| Erol et al, 2010           | 2010                | NR                  | Continuous                       | NO                        | 0.05                                                     | NR                   | 0.2                                                                 | NR                      | 32                                                                                                                         | NR                                                            | NR                                                                                                             | NR                                                                                            |                                                    |
| Eslami et al, 2009         | 2009                | NR                  | Continuous                       | NO                        | 0.05                                                     | NR                   | NR                                                                  | NR                      | NR                                                                                                                         | NR                                                            | NR                                                                                                             | NR                                                                                            |                                                    |
| Ferreira et al, 2009       | 2009                | NR                  | Unclear                          | NO                        | 0.05                                                     | NR                   | NR                                                                  | NR                      | NR                                                                                                                         | NR                                                            | NR                                                                                                             | NR                                                                                            |                                                    |
| Fujii et al, 2010          | 2010                | NCT00767039         | Continuous                       | NO                        | 0.05                                                     | NR                   | 0.2                                                                 | NR                      | 68                                                                                                                         | Lit                                                           | NR                                                                                                             | NR                                                                                            |                                                    |
| Galante et al, 2008        | 2008                | NR                  | Continuous                       | NO                        | 0.05                                                     | two-sided            | 0.2                                                                 | 0.84                    | 46                                                                                                                         | PS                                                            | 2                                                                                                              | NR                                                                                            |                                                    |
| Ghai et al, 2009           | 2009                | NR                  | Dichotomous                      | NO                        | 0.05                                                     | NR                   | 0.2                                                                 | 0.7                     | 42                                                                                                                         | PS                                                            | 0.43                                                                                                           | 0.77                                                                                          |                                                    |
| Ghai et al, 2009 (2)       | 2009                | NR                  | Dichotomous                      | NO                        | 0.05                                                     | two-sided            | 0.1                                                                 | 0.6                     | 112                                                                                                                        | PS                                                            | 0.5                                                                                                            | 0.69                                                                                          |                                                    |
| Gounaris et al, 2010       | 2010                | NR                  | Continuous                       | YES                       | NR                                                       | NR                   | NR                                                                  | NR                      | NR                                                                                                                         | NR                                                            | NR                                                                                                             | NR                                                                                            |                                                    |
| Gutmann et al, 2006        | 2006                | NR                  | Continuous                       | NO                        | 0.05                                                     | NR                   | 0.1                                                                 | NR                      | 90                                                                                                                         | Lit                                                           | NR                                                                                                             | NR                                                                                            |                                                    |
| Hassid et al, 2007         | 2007                | NR                  | Dichotomous                      | NO                        | 0.05                                                     | NR                   | 0.2                                                                 | 0.75                    | 38                                                                                                                         | OE                                                            | 0.33                                                                                                           | 0.39                                                                                          |                                                    |
| Jacomo et al, 2011         | 2011                | NCT00829842         | Dichotomous                      | NO                        | 0.05                                                     | NR                   | 0.2                                                                 | 0.31                    | 160                                                                                                                        | OE                                                            | 0.5                                                                                                            | 0.298                                                                                         |                                                    |
| Jeschke et al, 2007        | 2007                | NR                  | Unclear                          | NO                        | 0.05                                                     | NR                   | NR                                                                  | NR                      | NR                                                                                                                         | NR                                                            | NR                                                                                                             | NR                                                                                            |                                                    |
| Kaabachi et al, 2007       | 2007                | NR                  | Dichotomous                      | NO                        | 0.05                                                     | two-sided            | 0.1                                                                 | 0.37                    | 82                                                                                                                         | Lit                                                           | 0.22                                                                                                           | 0.22                                                                                          |                                                    |
| Kaabachi et al, 2007 (2)   | 2007                | NR                  | Continuous                       | NO                        | 0.05                                                     | two-sided            | 0.1                                                                 | 40                      | 84                                                                                                                         | Lit                                                           | 0.74                                                                                                           | 49.58                                                                                         |                                                    |
| Karanovic et al, 2006      | 2006                | NR                  | Dichotomous                      | NO                        | 0.05                                                     | NR                   | 0.2                                                                 | NR                      | 120                                                                                                                        | Lit                                                           | NR                                                                                                             | NR                                                                                            |                                                    |
| Khalifa et al, 2009        | 2009                | NR                  | Continuous                       | NO                        | 0.05                                                     | NR                   | NR                                                                  | NR                      | NR                                                                                                                         | NR                                                            | NR                                                                                                             | NR                                                                                            |                                                    |
| Kneyber et al, 2008        | 2008                | ISRCTN86554663      | Continuous                       | NO                        | 0.05                                                     | one-sided            | 0.2                                                                 | 84                      | 100                                                                                                                        | Lit                                                           | 0.59                                                                                                           | 54.3                                                                                          |                                                    |
| Koruk et al, 2010          | 2010                | NR                  | Dichotomous                      | NO                        | 0.05                                                     | NR                   | NR                                                                  | NR                      | 18                                                                                                                         | OE                                                            | NR                                                                                                             | NR                                                                                            |                                                    |
| Kuhn et al, 2009           | 2009                | NCT00213759         | Dichotomous                      | NO                        | 0.05                                                     | NR                   | 0.1                                                                 | 0.4                     | 200                                                                                                                        | Lit                                                           | 0.5                                                                                                            | 0.67                                                                                          |                                                    |
| Lago et al, 2008           | 2008                | NR                  | Dichotomous                      | NO                        | 0.05                                                     | two-sided            | 0.15                                                                | 0.7                     | 54                                                                                                                         | PS                                                            | 0.43                                                                                                           | NR                                                                                            |                                                    |
| Lee et al, 2010            | 2010                | NR                  | Dichotomous                      | NO                        | 0.05                                                     | two-sided            | 0.2                                                                 | 0.85                    | 288                                                                                                                        | Lit                                                           | 0.76                                                                                                           | 0.93                                                                                          |                                                    |
| Lemyre et al, 2007         | 2007                | NR                  | Continuous                       | NO                        | 0.05                                                     | two-sided            | 0.2                                                                 | 4.7                     | 130                                                                                                                        | Lit                                                           | -0.5                                                                                                           | 4.7                                                                                           |                                                    |
| Lucas da Silva et al, 2007 | 2007                | NR                  | Continuous                       | NO                        | 0.05                                                     | NR                   | NR                                                                  | NR                      | NR                                                                                                                         | NR                                                            | NR                                                                                                             | NR                                                                                            |                                                    |
| Marraro et al, 2007        | 2007                | NR                  | Continuous                       | NO                        | 0.05                                                     | NR                   | NR                                                                  | NR                      | NR                                                                                                                         | NR                                                            | NR                                                                                                             | NR                                                                                            |                                                    |

|                           |      |                |             |     |      |           |      |      |     |     |      |        |
|---------------------------|------|----------------|-------------|-----|------|-----------|------|------|-----|-----|------|--------|
| Michel et al, 2010        | 2010 | NCT00420693    | Continuous  | NO  | 0.05 | NR        | 0.2  | 20   | 58  | NR  | 0.75 | NR     |
| Murugesan et al, 2008     | 2008 | NR             | Continuous  | NO  | 0.05 | NR        | NR   | NR   | NR  | NR  | NR   | 8.84   |
| Nagdeve et al, 2006       | 2006 | NR             | Continuous  | NO  | NR   | NR        | NR   | NR   | NR  | NR  | NR   | NR     |
| Namachivayam et al, 2006  | 2006 | NR             | Dichotomous | NO  | 0.05 | two-sided | 0.17 | 0.9  | 40  | OE  | 0.67 | 0.71   |
| Nyman et al, 2006         | 2006 | NR             | Dichotomous | NO  | 0.05 | NR        | 0.1  | 0.25 | 110 | OE  | 0.2  | 0.48   |
| Nyman et al, 2011         | 2011 | NR             | Dichotomous | NO  | 0.05 | NR        | 0.1  | 0.8  | 80  | Lit | 0.5  | 0.725  |
| Parikh et al, 2007        | 2007 | NR             | Dichotomous | NO  | 0.05 | two-sided | 0.16 | 0.22 | 120 | OE  | 0.2  | 0.3    |
| Pasha et al, 2008         | 2008 | NR             | Continuous  | NO  | NR   | NR        | NR   | NR   | NR  | NR  | NR   | NR     |
| Pedreira et al, 2009      | 2009 | NR             | Continuous  | NO  | 0.05 | NR        | NR   | NR   | NR  | NR  | NR   | NR     |
| Penido et al, 2011        | 2011 | NR             | Dichotomous | NO  | 0.05 | two-sided | 0.2  | NR   | 20  | NR  | NR   | 0.3    |
| Pourarian et al, 2008     | 2008 | NR             | Dichotomous | NO  | NR   | NR        | NR   | NR   | 20  | NR  | NR   | NR     |
| Riethmueller et al, 2006  | 2006 | NR             | Dichotomous | NO  | 0.05 | one-sided | 0.2  | 0.2  | 120 | NR  | 0.25 | 0.097  |
| Santos et al, 2007        | 2007 | NR             | Continuous  | NO  | 0.05 | NR        | NR   | NR   | NR  | NR  | NR   | NR     |
| Schroeder et al, 2010     | 2010 | NCT00779558.   | Dichotomous | NO  | 0.05 | two-sided | 0.2  | 0.2  | 160 | Lit | 0.25 | 0.16   |
| Shi et al, 2008           | 2008 | NR             | Dichotomous | NO  | 0.05 | NR        | NR   | NR   | NR  | NR  | NR   | 0.42   |
| Simons et al, 2006        | 2006 | NR             | Continuous  | NO  | 0.05 | two-sided | 0.1  | NR   | 140 | NR  | 0.55 | NR     |
| Singh et al, 2010         | 2010 | NR             | Dichotomous | NO  | 0.05 | NR        | 0.1  | NR   | 40  | Lit | NR   | 0.2    |
| Sinha et al, 2010         | 2010 | NR             | Dichotomous | NO  | 0.05 | NR        | 0.2  | 0.4  | 60  | NR  | 0.25 | 0.533  |
| Soltész et al, 2007       | 2007 | NR             | Dichotomous | NO  | 0.05 | two-sided | 0.2  | 0.66 | 58  | Lit | 0.5  | 0.2    |
| Sorce et al, 2009         | 2009 | NR             | Dichotomous | YES | 0.05 | NR        | 0.2  | 0.15 | 188 | NR  | NR   | 0.06   |
| Uslu et al, 2010          | 2010 | NR             | Continuous  | NO  | 0.05 | NR        | NR   | NR   | NR  | NR  | NR   | NR     |
| Van Woensel et al, 2011 A | 2011 | ISRCTN13421709 | Continuous  | NO  | 0.05 | two-sided | 0.2  | 4    | 128 | Lit | 0.5  | NR     |
| Van Woensel et al, 2011 B | 2011 | ISRCTN13421709 | Continuous  | NO  | 0.05 | one-sided | 0.2  | 4    | 102 | Lit | 0.5  | NR     |
| Vargas-Origel et al, 2010 | 2010 | NR             | Continuous  | NO  | 0.05 | NR        | 0.2  | NR   | NR  | Lit | NR   | NR     |
| Vlasselaers et al, 2009   | 2009 | NCT00214916    | Continuous  | NO  | 0.05 | two-sided | 0.2  | NR   | 700 | Lit | NR   | NR     |
| Williams et al, 2008      | 2008 | NR             | Continuous  | NO  | 0.05 | NR        | 0.2  | NR   | 40  | Lit | NR   | 114.11 |
| Xia et al, 2011           | 2011 | NR             | Continuous  | NO  | 0.05 | NR        | NR   | NR   | NR  | NR  | NR   | NR     |
| Yildizdas et al, 2008     | 2008 | NR             | Continuous  | NO  | 0.05 | NR        | NR   | NR   | NR  | NR  | NR   | NR     |
